# Supplementary material
Source: PubMed Central journal article supplement (PMC3023542)

**Supplementary Fig. 1.** FSP27 protein expression is decreased by IL-1 $\beta$  and IFN $\gamma$  treatments but not IL-6. Mature 3T3-L1 adipocytes were treated with either 50,100 ng/ml IL-6 (A) or 1,10,20,100 ng/ml IL-1 $\beta$  (B) or 50,100ng/ml IFN $\gamma$  (C) and harvested for protein samples. Western blot analysis using FSP27 and Actin antibodies on cells harvested after 24 hr with IL-6 or IL-1 $\beta$  or 48hrs treatment with IFN $\gamma$ .

**Supplementary Fig. 2.** Lipolysis stimulated by FSP27 depletion or by TNF- $\alpha$  is dependent upon ATGL. 3T3-L1 adipocytes were electroporated with Scr, FSP27, ATGL, or FSP27 and ATGL siRNA on the fourth day of differentiation. On the sixth day cells were treated with 10 ng/ml TNF- $\alpha$  for 16 hr. Glycerol release in media after 16 hr of 10 ng/ml TNF- $\alpha$  treatment. Data shown is mean $\pm$  S.E of five individual experiments, p-value calculated using ANOVA, p  $<0.05$ . The attenuation of glycerol release after TNF- $\alpha$  treatment under ATGL KD and/or FSP KD is also significant (p  $<0.05$ ).

# Supplementary Figure 1

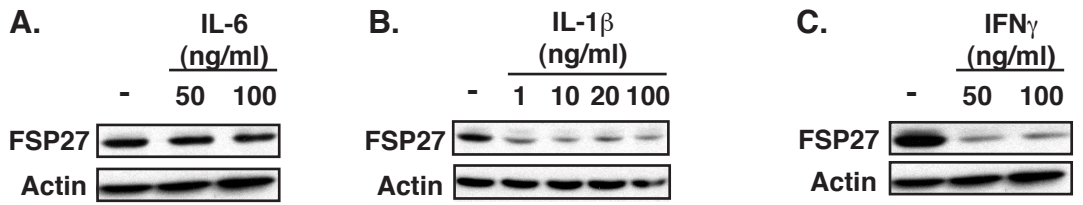

# Supplementary Figure 2

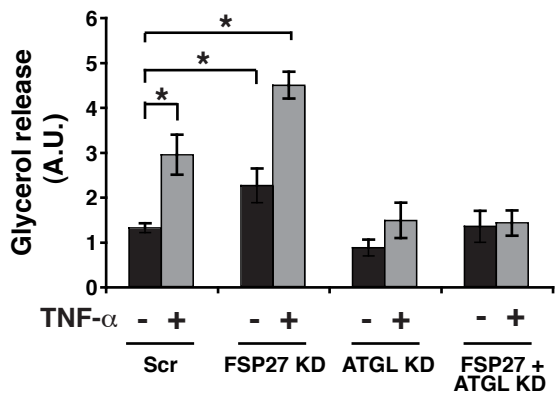

Supplement: supp_M008771_jlr.M008771-1.pdf [file supp_M008771_jlr.M008771-1.pdf]
